# Supplementary material for: Thyroid Cancer Survival in the Multiethnic Cohort Study
Source: MDPI journal article supplement (doi:10.3390/ijerph21030324), 2024-03-10
Supplement: s1 [file s1]

**Table S1.** Relative risk of death by sex and race and ethnicity and 5 and 10-year survival by stage among thyroid cancer cases, the Multiethnic Cohort Study 1993-2017.

|                                 | Men                   | Women | African<br>American   | Filipino             | Native<br>Hawaiian    | Japanese<br>American | Latino               | White                 | <i>p</i> <sup>c</sup> |
|---------------------------------|-----------------------|-------|-----------------------|----------------------|-----------------------|----------------------|----------------------|-----------------------|-----------------------|
| <b>Localized</b>                |                       |       |                       |                      |                       |                      |                      |                       |                       |
| Minimally adjusted <sup>a</sup> |                       |       |                       |                      |                       |                      |                      |                       |                       |
| 5-year, %                       | 81.3                  | 90.9  | 83.7                  | 85.2                 | 83.6                  | 89.9                 | 90.3                 | 93.1                  |                       |
| 10-year, %                      | 66.5                  | 82.0  | 70.2                  | 72.6                 | 70.1                  | 80.3                 | 81.1                 | 86.0                  |                       |
| HR (95% CI)                     | 1.85<br>(1.17, 2.93)* | Ref   | 1.69<br>(0.88, 3.25)  | 1.91<br>(0.81, 4.52) | 1.71<br>(0.84, 3.48)  | Ref                  | 1.00<br>(0.53, 5.04) | 0.83<br>(0.41, 1.70)  | 0.27                  |
| Fully adjusted <sup>b</sup>     |                       |       |                       |                      |                       |                      |                      |                       |                       |
| 5-year, %                       | 80.0                  | 91.3  | 85.6                  | 85.2                 | 85.2                  | 87.6                 | 91.4                 | 92.6                  |                       |
| 10-year, %                      | 63.7                  | 82.1  | 72.4                  | 71.7                 | 71.7                  | 75.7                 | 82.2                 | 84.3                  |                       |
| HR (95% CI)                     | 2.21<br>(1.53, 3.18)* | Ref   | 1.12<br>(0.53, 2.38)  | 1.44<br>(0.58, 3.58) | 1.20<br>(0.56, 2.57)  | Ref                  | 0.62<br>(0.31, 1.25) | 0.61<br>(0.28, 1.32)  | 0.13                  |
| <b>Regional/distant</b>         |                       |       |                       |                      |                       |                      |                      |                       |                       |
| Minimally adjusted <sup>a</sup> |                       |       |                       |                      |                       |                      |                      |                       |                       |
| 5-year, %                       | 55.0                  | 73.8  | 57.2                  | 66.5                 | 50.8                  | 77.2                 | 68.7                 | 60.4                  |                       |
| 10-year, %                      | 36.4                  | 58.2  | 39.2                  | 49.5                 | 32.8                  | 63.0                 | 52.1                 | 42.6                  |                       |
| HR (95% CI)                     | 2.39<br>(1.36, 4.21)* | Ref   | 2.70<br>(1.45, 5.04)* | 1.75<br>(0.90, 3.40) | 3.15<br>(1.55, 6.40)* | Ref                  | 1.63<br>(0.99, 2.69) | 2.39<br>(1.36, 4.21)* | 0.61                  |
| Fully adjusted <sup>b</sup>     |                       |       |                       |                      |                       |                      |                      |                       |                       |
| 5-year, %                       | 54.6                  | 73.6  | 61.3                  | 66.0                 | 59.2                  | 75.3                 | 69.4                 | 57.9                  |                       |
| 10-year, %                      | 36.6                  | 58.3  | 43.5                  | 48.8                 | 41.2                  | 60.2                 | 52.7                 | 40.6                  |                       |
| HR (95% CI)                     | 1.85<br>(1.17, 2.93)* | Ref   | 1.53 (0.72,<br>3.25)  | 1.55<br>(0.77,3.13)  | 1.66<br>(0.74,3.77)   | Ref                  | 1.47 (0.82,<br>2.64) | 1.95<br>(1.02,3.72)*  | 0.68                  |

\*Statistically significant

<sup>a</sup> Derived from a Cox regression model with age at diagnosis, race and ethnicity, and sex

<sup>b</sup> Additionally adjusted for treatment, BMI ( $\leq 25$ , 25-29.9,  $\geq 30$  kg/m<sup>2</sup>), smoking status (former, never, current), alcohol intake (g/day) and nSES.

<sup>c</sup> *p* value for global Wald test for race and ethnicity.
